# Supplementary material for: Molecular characterization and phylogenetic analysis of bovine ephemeral fever viruses in Khuzestan province of Iran in 2018 and 2020
Source: BMC Vet Res. 2022 Jan 6;18:19. doi: 10.1186/s12917-021-03119-x (PMC8734343; doi:10.1186/s12917-021-03119-x)
Supplement: Supplementary file 1 — Additional file 1: Supplementary Table 1. Amino acid identity of BEFVs from different countries according to glycoprotein. [file 12917_2021_3119_MOESM1_ESM.xlsx]

## Sheet: Sheet1
Seq->	1	2	3	4	5	6	7	8	9	10	11	12	13	14	15	16	17	18	19	20	21	22	23	24	25	26	27	28	29	30	31	32	33	34	35	36	37	38	39	40	41	42	43	44	45
1. MZ51168.1. Iran. 2020	ID	0.99	0.969	0.971	0.939	0.995	0.995	0.993	0.987	0.985	0.935	0.937	0.969	0.985	0.967	0.971	0.969	0.972	0.972	0.969	0.963	0.947	0.971	0.985	0.972	0.974	0.971	0.947	0.972	0.967	1	0.937	0.967	0.969	0.966	0.966	0.947	0.974	0.959	0.961	0.969	0.942	0.95	0.935	0.935
2. MZ51169.1. Iran. 2018	0.99	ID	0.964	0.966	0.934	0.988	0.988	0.99	0.985	0.983	0.93	0.939	0.971	0.98	0.966	0.967	0.964	0.967	0.967	0.964	0.958	0.951	0.966	0.98	0.967	0.972	0.966	0.951	0.967	0.963	0.99	0.932	0.969	0.971	0.961	0.959	0.951	0.972	0.956	0.955	0.966	0.937	0.945	0.93	0.93
3. AFV92502.1. China. 2002	0.969	0.964	ID	0.991	0.939	0.971	0.971	0.966	0.972	0.971	0.935	0.934	0.987	0.972	0.985	0.991	0.99	0.993	0.993	0.99	0.98	0.948	0.998	0.972	0.993	0.969	0.991	0.948	0.993	0.988	0.969	0.937	0.985	0.987	0.983	0.985	0.948	0.969	0.974	0.977	0.99	0.961	0.959	0.934	0.934
4. AFV92500.1. China. 2011	0.971	0.966	0.991	ID	0.94	0.972	0.972	0.967	0.974	0.972	0.937	0.935	0.988	0.974	0.987	0.993	0.991	0.995	0.995	0.991	0.988	0.95	0.993	0.974	0.998	0.971	0.996	0.95	0.995	0.99	0.971	0.939	0.987	0.988	0.991	0.99	0.95	0.971	0.979	0.982	0.991	0.963	0.961	0.935	0.935
5. QRZ60240.1. South Africa. 1973	0.939	0.934	0.939	0.94	ID	0.937	0.937	0.935	0.939	0.937	0.993	0.924	0.939	0.939	0.937	0.94	0.939	0.942	0.943	0.939	0.932	0.919	0.94	0.939	0.942	0.939	0.94	0.919	0.943	0.939	0.939	0.998	0.937	0.939	0.935	0.935	0.919	0.939	0.93	0.932	0.939	0.919	0.919	0.985	0.985
6. QOU09204.1. India. 2019	0.995	0.988	0.971	0.972	0.937	ID	1	0.991	0.988	0.987	0.934	0.935	0.967	0.988	0.966	0.972	0.971	0.974	0.974	0.971	0.961	0.948	0.972	0.988	0.974	0.975	0.969	0.948	0.974	0.969	0.995	0.935	0.966	0.967	0.964	0.966	0.948	0.975	0.956	0.958	0.971	0.942	0.95	0.934	0.934
7. QIR81985.1. India. 2018	0.995	0.988	0.971	0.972	0.937	1	ID	0.991	0.988	0.987	0.934	0.935	0.967	0.988	0.966	0.972	0.971	0.974	0.974	0.971	0.961	0.948	0.972	0.988	0.974	0.975	0.969	0.948	0.974	0.969	0.995	0.935	0.966	0.967	0.964	0.966	0.948	0.975	0.956	0.958	0.971	0.942	0.95	0.934	0.934
8. QDM55301.1. Israel. 2006	0.993	0.99	0.966	0.967	0.935	0.991	0.991	ID	0.983	0.982	0.932	0.93	0.966	0.982	0.964	0.967	0.966	0.969	0.969	0.966	0.959	0.943	0.967	0.982	0.969	0.971	0.967	0.943	0.969	0.964	0.993	0.934	0.964	0.966	0.963	0.961	0.943	0.971	0.955	0.958	0.966	0.939	0.947	0.932	0.932
9. ACT10807.1. Turkey. 2008	0.987	0.985	0.972	0.974	0.939	0.988	0.988	0.983	ID	0.998	0.935	0.935	0.969	0.991	0.967	0.975	0.972	0.975	0.975	0.972	0.963	0.955	0.974	0.991	0.975	0.983	0.971	0.955	0.975	0.971	0.987	0.937	0.967	0.969	0.966	0.967	0.955	0.983	0.958	0.959	0.974	0.943	0.951	0.935	0.935
10. ACT10806.1. Turkey. 2008	0.985	0.983	0.971	0.972	0.937	0.987	0.987	0.982	0.998	ID	0.934	0.934	0.967	0.99	0.966	0.974	0.971	0.974	0.974	0.971	0.961	0.953	0.972	0.99	0.974	0.982	0.969	0.953	0.974	0.969	0.985	0.935	0.966	0.967	0.964	0.966	0.953	0.982	0.956	0.958	0.972	0.942	0.95	0.934	0.934
11. QRZ60231.1. South Africa. 2008	0.935	0.93	0.935	0.937	0.993	0.934	0.934	0.932	0.935	0.934	ID	0.924	0.935	0.935	0.934	0.937	0.935	0.939	0.939	0.935	0.929	0.914	0.937	0.935	0.939	0.935	0.937	0.914	0.939	0.934	0.935	0.991	0.934	0.935	0.932	0.932	0.914	0.935	0.927	0.929	0.935	0.916	0.916	0.982	0.982
12. QED88239.1. Mayotte. 2017	0.937	0.939	0.934	0.935	0.924	0.935	0.935	0.93	0.935	0.934	0.924	ID	0.937	0.932	0.932	0.937	0.937	0.937	0.937	0.934	0.924	0.919	0.935	0.932	0.937	0.929	0.932	0.919	0.937	0.932	0.937	0.922	0.935	0.937	0.927	0.934	0.919	0.929	0.929	0.927	0.935	0.913	0.914	0.921	0.921
13. AZM32431.1. Thailand. 2016	0.969	0.971	0.987	0.988	0.939	0.967	0.967	0.966	0.969	0.967	0.935	0.937	ID	0.969	0.991	0.988	0.987	0.99	0.99	0.987	0.98	0.951	0.988	0.969	0.99	0.966	0.988	0.951	0.99	0.985	0.969	0.937	0.998	1	0.983	0.982	0.951	0.966	0.977	0.977	0.987	0.961	0.958	0.934	0.934
14. AGO58931.1. Turkey. 2012	0.985	0.98	0.972	0.974	0.939	0.988	0.988	0.982	0.991	0.99	0.935	0.932	0.969	ID	0.967	0.974	0.972	0.975	0.975	0.972	0.963	0.951	0.974	1	0.975	0.979	0.971	0.951	0.975	0.971	0.985	0.937	0.967	0.969	0.966	0.967	0.951	0.979	0.958	0.959	0.972	0.943	0.951	0.935	0.935
15. AYO89334.1. China. 2017	0.967	0.966	0.985	0.987	0.937	0.966	0.966	0.964	0.967	0.966	0.934	0.932	0.991	0.967	ID	0.987	0.985	0.988	0.988	0.985	0.979	0.947	0.987	0.967	0.988	0.964	0.987	0.947	0.988	0.983	0.967	0.935	0.99	0.991	0.982	0.98	0.947	0.964	0.972	0.975	0.985	0.958	0.956	0.932	0.932
16. AJF40143.1. Taiwan. 2012	0.971	0.967	0.991	0.993	0.94	0.972	0.972	0.967	0.975	0.974	0.937	0.937	0.988	0.974	0.987	ID	0.991	0.995	0.995	0.991	0.982	0.951	0.993	0.974	0.995	0.972	0.99	0.951	0.995	0.99	0.971	0.939	0.987	0.988	0.985	0.987	0.951	0.972	0.975	0.979	0.998	0.963	0.961	0.935	0.935
17. 1AAV65639.1. Taiwan. 2004	0.969	0.964	0.99	0.991	0.939	0.971	0.971	0.966	0.972	0.971	0.935	0.937	0.987	0.972	0.985	0.991	ID	0.993	0.993	0.99	0.98	0.948	0.991	0.972	0.993	0.969	0.988	0.948	0.993	0.995	0.969	0.937	0.985	0.987	0.983	0.985	0.948	0.969	0.974	0.977	0.99	0.961	0.959	0.934	0.934
18. AAF24765.1. Taiwan. 1999	0.972	0.967	0.993	0.995	0.942	0.974	0.974	0.969	0.975	0.974	0.939	0.937	0.99	0.975	0.988	0.995	0.993	ID	0.996	0.993	0.983	0.951	0.995	0.975	0.996	0.972	0.991	0.951	0.996	0.991	0.972	0.94	0.988	0.99	0.987	0.988	0.951	0.972	0.977	0.98	0.993	0.964	0.963	0.937	0.937
19. AAX63414.1. Taiwan. 2001	0.972	0.967	0.993	0.995	0.943	0.974	0.974	0.969	0.975	0.974	0.939	0.937	0.99	0.975	0.988	0.995	0.993	0.996	ID	0.993	0.983	0.953	0.995	0.975	0.996	0.972	0.991	0.953	1	0.995	0.972	0.942	0.988	0.99	0.987	0.988	0.953	0.972	0.977	0.98	0.993	0.964	0.963	0.937	0.937
20. AAX35335.1. Taiwan. 1996	0.969	0.964	0.99	0.991	0.939	0.971	0.971	0.966	0.972	0.971	0.935	0.934	0.987	0.972	0.985	0.991	0.99	0.993	0.993	ID	0.98	0.948	0.991	0.972	0.993	0.969	0.988	0.948	0.993	0.988	0.969	0.937	0.985	0.987	0.983	0.995	0.948	0.969	0.974	0.977	0.99	0.961	0.959	0.934	0.934
21. QIB02047.1. China. 2015	0.963	0.958	0.98	0.988	0.932	0.961	0.961	0.959	0.963	0.961	0.929	0.924	0.98	0.963	0.979	0.982	0.98	0.983	0.983	0.98	ID	0.94	0.982	0.963	0.987	0.959	0.988	0.94	0.983	0.979	0.963	0.93	0.979	0.98	0.983	0.979	0.94	0.959	0.971	0.974	0.98	0.953	0.951	0.927	0.927
22. QIB02047.1.China. 2015	0.947	0.951	0.948	0.95	0.919	0.948	0.948	0.943	0.955	0.953	0.914	0.919	0.951	0.951	0.947	0.951	0.948	0.951	0.953	0.948	0.94	ID	0.95	0.951	0.951	0.955	0.947	1	0.953	0.948	0.947	0.918	0.95	0.951	0.942	0.943	1	0.955	0.935	0.935	0.95	0.924	0.926	0.913	0.913
23. ASB16900.1. China. 2002	0.971	0.966	0.998	0.993	0.94	0.972	0.972	0.967	0.974	0.972	0.937	0.935	0.988	0.974	0.987	0.993	0.991	0.995	0.995	0.991	0.982	0.95	ID	0.974	0.995	0.971	0.993	0.95	0.995	0.99	0.971	0.939	0.987	0.988	0.985	0.987	0.95	0.971	0.975	0.979	0.991	0.963	0.961	0.935	0.935
24. ARE59191.1. Turkey. 2012	0.985	0.98	0.972	0.974	0.939	0.988	0.988	0.982	0.991	0.99	0.935	0.932	0.969	1	0.967	0.974	0.972	0.975	0.975	0.972	0.963	0.951	0.974	ID	0.975	0.979	0.971	0.951	0.975	0.971	0.985	0.937	0.967	0.969	0.966	0.967	0.951	0.979	0.958	0.959	0.972	0.943	0.951	0.935	0.935
25. AJG00201.1. Taiwan. 2014	0.972	0.967	0.993	0.998	0.942	0.974	0.974	0.969	0.975	0.974	0.939	0.937	0.99	0.975	0.988	0.995	0.993	0.996	0.996	0.993	0.987	0.951	0.995	0.975	ID	0.972	0.995	0.951	0.996	0.991	0.972	0.94	0.988	0.99	0.99	0.991	0.951	0.972	0.98	0.983	0.993	0.964	0.963	0.937	0.937
26. AJC97777.1. Egypt. 2012	0.974	0.972	0.969	0.971	0.939	0.975	0.975	0.971	0.983	0.982	0.935	0.929	0.966	0.979	0.964	0.972	0.969	0.972	0.972	0.969	0.959	0.955	0.971	0.979	0.972	ID	0.967	0.955	0.972	0.967	0.974	0.937	0.964	0.966	0.963	0.964	0.955	1	0.955	0.956	0.971	0.94	0.961	0.935	0.935
27. AIW62182.1. China. 2012	0.971	0.966	0.991	0.996	0.94	0.969	0.969	0.967	0.971	0.969	0.937	0.932	0.988	0.971	0.987	0.99	0.988	0.991	0.991	0.988	0.988	0.947	0.993	0.971	0.995	0.967	ID	0.947	0.991	0.987	0.971	0.939	0.987	0.988	0.991	0.987	0.947	0.967	0.979	0.982	0.988	0.961	0.959	0.935	0.935
28. AAG10413.1. Australia	0.947	0.951	0.948	0.95	0.919	0.948	0.948	0.943	0.955	0.953	0.914	0.919	0.951	0.951	0.947	0.951	0.948	0.951	0.953	0.948	0.94	1	0.95	0.951	0.951	0.955	0.947	ID	0.953	0.948	0.947	0.918	0.95	0.951	0.942	0.943	1	0.955	0.935	0.935	0.95	0.924	0.926	0.913	0.913
29. AAV37461.1. Taiwan. 2002	0.972	0.967	0.993	0.995	0.943	0.974	0.974	0.969	0.975	0.974	0.939	0.937	0.99	0.975	0.988	0.995	0.993	0.996	1	0.993	0.983	0.953	0.995	0.975	0.996	0.972	0.991	0.953	ID	0.995	0.972	0.942	0.988	0.99	0.987	0.988	0.953	0.972	0.977	0.98	0.993	0.964	0.963	0.937	0.937
30. AAL38191.1. China. 2001	0.967	0.963	0.988	0.99	0.939	0.969	0.969	0.964	0.971	0.969	0.934	0.932	0.985	0.971	0.983	0.99	0.995	0.991	0.995	0.988	0.979	0.948	0.99	0.971	0.991	0.967	0.987	0.948	0.995	ID	0.967	0.937	0.983	0.985	0.982	0.983	0.948	0.967	0.972	0.975	0.988	0.959	0.958	0.932	0.932
31. QVE05145.1. Turkey. 2020	1	0.99	0.969	0.971	0.939	0.995	0.995	0.993	0.987	0.985	0.935	0.937	0.969	0.985	0.967	0.971	0.969	0.972	0.972	0.969	0.963	0.947	0.971	0.985	0.972	0.974	0.971	0.947	0.972	0.967	ID	0.937	0.967	0.969	0.966	0.966	0.947	0.974	0.959	0.961	0.969	0.942	0.95	0.935	0.935
32. QGY73640.1. South Africa. 2018	0.937	0.932	0.937	0.939	0.998	0.935	0.935	0.934	0.937	0.935	0.991	0.922	0.937	0.937	0.935	0.939	0.937	0.94	0.942	0.937	0.93	0.918	0.939	0.937	0.94	0.937	0.939	0.918	0.942	0.937	0.937	ID	0.935	0.937	0.934	0.934	0.918	0.937	0.929	0.93	0.937	0.918	0.918	0.983	0.983
33. QBQ82420.1. China. 2017	0.967	0.969	0.985	0.987	0.937	0.966	0.966	0.964	0.967	0.966	0.934	0.935	0.998	0.967	0.99	0.987	0.985	0.988	0.988	0.985	0.979	0.95	0.987	0.967	0.988	0.964	0.987	0.95	0.988	0.983	0.967	0.935	ID	0.998	0.982	0.98	0.95	0.964	0.975	0.975	0.985	0.959	0.956	0.932	0.932
34. AZB87552.1. Thailand. 2016	0.969	0.971	0.987	0.988	0.939	0.967	0.967	0.966	0.969	0.967	0.935	0.937	1	0.969	0.991	0.988	0.987	0.99	0.99	0.987	0.98	0.951	0.988	0.969	0.99	0.966	0.988	0.951	0.99	0.985	0.969	0.937	0.998	ID	0.983	0.982	0.951	0.966	0.977	0.977	0.987	0.961	0.958	0.934	0.934
35. AFQ99299.1. China. 2011	0.966	0.961	0.983	0.991	0.935	0.964	0.964	0.963	0.966	0.964	0.932	0.927	0.983	0.966	0.982	0.985	0.983	0.987	0.987	0.983	0.983	0.942	0.985	0.966	0.99	0.963	0.991	0.942	0.987	0.982	0.966	0.934	0.982	0.983	ID	0.982	0.942	0.963	0.974	0.977	0.983	0.956	0.955	0.93	0.93
36. AGG86672.1. Turkey. 2012	0.966	0.959	0.985	0.99	0.935	0.966	0.966	0.961	0.967	0.966	0.932	0.934	0.982	0.967	0.98	0.987	0.985	0.988	0.988	0.995	0.979	0.943	0.987	0.967	0.991	0.964	0.987	0.943	0.988	0.983	0.966	0.934	0.98	0.982	0.982	ID	0.943	0.964	0.979	0.982	0.985	0.956	0.955	0.93	0.93
37. AAA42760.1. Australia	0.947	0.951	0.948	0.95	0.919	0.948	0.948	0.943	0.955	0.953	0.914	0.919	0.951	0.951	0.947	0.951	0.948	0.951	0.953	0.948	0.94	1	0.95	0.951	0.951	0.955	0.947	1	0.953	0.948	0.947	0.918	0.95	0.951	0.942	0.943	ID	0.955	0.935	0.935	0.95	0.924	0.926	0.913	0.913
38. AJC97777.1. Egypt.2012	0.974	0.972	0.969	0.971	0.939	0.975	0.975	0.971	0.983	0.982	0.935	0.929	0.966	0.979	0.964	0.972	0.969	0.972	0.972	0.969	0.959	0.955	0.971	0.979	0.972	1	0.967	0.955	0.972	0.967	0.974	0.937	0.964	0.966	0.963	0.964	0.955	ID	0.955	0.956	0.971	0.94	0.961	0.935	0.935
39. AWR92779.1. Iran. 2012	0.959	0.956	0.974	0.979	0.93	0.956	0.956	0.955	0.958	0.956	0.927	0.929	0.977	0.958	0.972	0.975	0.974	0.977	0.977	0.974	0.971	0.935	0.975	0.958	0.98	0.955	0.979	0.935	0.977	0.972	0.959	0.929	0.975	0.977	0.974	0.979	0.935	0.955	ID	0.993	0.974	0.962	0.961	0.927	0.927
40. AWR92780.1. Iran. 2013	0.961	0.955	0.977	0.982	0.932	0.958	0.958	0.958	0.959	0.958	0.929	0.927	0.977	0.959	0.975	0.979	0.977	0.98	0.98	0.977	0.974	0.935	0.979	0.959	0.983	0.956	0.982	0.935	0.98	0.975	0.961	0.93	0.975	0.977	0.977	0.982	0.935	0.956	0.993	ID	0.977	0.966	0.964	0.929	0.929
41. AJG00193.1. Taiwan. 2012	0.969	0.966	0.99	0.991	0.939	0.971	0.971	0.966	0.974	0.972	0.935	0.935	0.987	0.972	0.985	0.998	0.99	0.993	0.993	0.99	0.98	0.95	0.991	0.972	0.993	0.971	0.988	0.95	0.993	0.988	0.969	0.937	0.985	0.987	0.983	0.985	0.95	0.971	0.974	0.977	ID	0.961	0.959	0.934	0.934
42. BAH60685.1. Japan. 1988	0.942	0.937	0.961	0.963	0.919	0.942	0.942	0.939	0.943	0.942	0.916	0.913	0.961	0.943	0.958	0.963	0.961	0.964	0.964	0.961	0.953	0.924	0.963	0.943	0.964	0.94	0.961	0.924	0.964	0.959	0.942	0.918	0.959	0.961	0.956	0.956	0.924	0.94	0.962	0.966	0.961	ID	0.978	0.914	0.914
43. BAH60677.1. Japan. YHL. 1966	0.95	0.945	0.959	0.961	0.919	0.95	0.95	0.947	0.951	0.95	0.916	0.914	0.958	0.951	0.956	0.961	0.959	0.963	0.963	0.959	0.951	0.926	0.961	0.951	0.963	0.961	0.959	0.926	0.963	0.958	0.95	0.918	0.956	0.958	0.955	0.955	0.926	0.961	0.961	0.964	0.959	0.978	ID	0.914	0.914
44. QGY73622.1. South Africa. 1969	0.935	0.93	0.934	0.935	0.985	0.934	0.934	0.932	0.935	0.934	0.982	0.921	0.934	0.935	0.932	0.935	0.934	0.937	0.937	0.934	0.927	0.913	0.935	0.935	0.937	0.935	0.935	0.913	0.937	0.932	0.935	0.983	0.932	0.934	0.93	0.93	0.913	0.935	0.927	0.929	0.934	0.914	0.914	ID	1
45. QGY73622.1. South Africa. 1968	0.935	0.93	0.934	0.935	0.985	0.934	0.934	0.932	0.935	0.934	0.982	0.921	0.934	0.935	0.932	0.935	0.934	0.937	0.937	0.934	0.927	0.913	0.935	0.935	0.937	0.935	0.935	0.913	0.937	0.932	0.935	0.983	0.932	0.934	0.93	0.93	0.913	0.935	0.927	0.929	0.934	0.914	0.914	1	ID
